# Supplementary material for: A Proof-of-Concept Analysis of Plasma-Derived Exosomal microRNAs in Interstitial Pulmonary Fibrosis Secondary to Antisynthetase Syndrome
Source: MDPI journal article supplement (doi:10.3390/ijms232314579), 2022-11-23
Supplement: s1 [file s1]

**Table S1.** List of miRNAs assessed in both ASD patients groups.

|                 |                 |                |                 |
|-----------------|-----------------|----------------|-----------------|
| hsa-let-7a-5p   | hsa-miR-146b-5p | hsa-miR-19a-3p | hsa-miR-29b-3p  |
| hsa-let-7b-5p   | hsa-miR-147a    | hsa-miR-19b-3p | hsa-miR-29c-3p  |
| hsa-let-7c-5p   | hsa-miR-148a-3p | hsa-miR-204-5p | hsa-miR-30a-5p  |
| hsa-let-7d-5p   | hsa-miR-150-5p  | hsa-miR-20a-5p | hsa-miR-30b-5p  |
| hsa-let-7e-5p   | hsa-miR-155-5p  | hsa-miR-20b-5p | hsa-miR-30c-5p  |
| hsa-let-7f-5p   | hsa-miR-15a-5p  | hsa-miR-21-5p  | hsa-miR-30d-5p  |
| hsa-let-7g-5p   | hsa-miR-15a-3p  | hsa-miR-210-3p | hsa-miR-30e-5p  |
| hsa-let-7i-5p   | hsa-miR-15b-5p  | hsa-miR-214-3p | hsa-miR-31-5p   |
| hsa-miR-100-5p  | hsa-miR-16-5p   | hsa-miR-221-3p | hsa-miR-326     |
| hsa-miR-101-3p  | hsa-miR-17-5p   | hsa-miR-222-3p | hsa-miR-331-3p  |
| hsa-miR-106b-5p | hsa-miR-17-3p   | hsa-miR-223-3p | hsa-miR-335-5p  |
| hsa-miR-125b-5p | hsa-miR-181a-5p | hsa-miR-23a-3p | hsa-miR-342-3p  |
| hsa-miR-126-3p  | hsa-miR-181b-5p | hsa-miR-23b-3p | hsa-miR-346     |
| hsa-miR-128-3p  | hsa-miR-181c-5p | hsa-miR-24-3p  | hsa-miR-34a-5p  |
| hsa-miR-130b-3p | hsa-miR-181d-5p | hsa-miR-25-3p  | hsa-miR-365b-3p |
| hsa-miR-132-3p  | hsa-miR-182-5p  | hsa-miR-26a-5p | hsa-miR-423-5p  |
| hsa-miR-139-5p  | hsa-miR-184     | hsa-miR-26b-5p | hsa-miR-574-3p  |
| hsa-miR-142-3p  | hsa-miR-18a-5p  | hsa-miR-27a-3p | hsa-miR-92a-3p  |
| hsa-miR-142-5p  | hsa-miR-191-5p  | hsa-miR-27b-3p | hsa-miR-93-5p   |
| hsa-miR-145-5p  | hsa-miR-195-5p  | hsa-miR-28-5p  | hsa-miR-98-5p   |
| hsa-miR-146a-5p | hsa-miR-199a-5p | hsa-miR-29a-3p | hsa-miR-99a-5p  |

**Table S2.** Median and Interquartile range of miRNAs analyzed in ASD without and with ILD. P value Bonferroni corrected.

|                 | ASD no ILD            | ASD ILD               | Adjusted P value |
|-----------------|-----------------------|-----------------------|------------------|
| hsa-let-7a-5p   | 4.30 (4.92-3.437)     | 2.8 (4.878 - -0.6313) | NS               |
| hsa-let-7b-5p   | 5.12 (5.895 - 3.875)  | 5.25 (6.4 - 4.351)    | NS               |
| hsa-let-7c-5p   | 7.05 (8.205 - 6.675)  | 7.235 (7.66 - 6.311)  | NS               |
| hsa-let-7d-5p   | 6.835 (7.36 - 6.415)  | 7.875 (7.93 - 7.32)   | NS               |
| hsa-let-7e-5p   | 6.685 (7.61 - 6.1)    | 6.185 (6.49 - 6.049)  | NS               |
| hsa-let-7f-5p   | 6.435 (7.585 - 5.5)   | 6.67 (7.21 - 5.985)   | NS               |
| hsa-let-7i-5p   | 10.64 (11.69 - 9.395) | 10.8 (12.92 - 10.53)  | NS               |
| hsa-miR-100-5p  | 10.44 (11.42 - 8.324) | 9.86 (12.63 - 9.52)   | NS               |
| hsa-miR-126-3p  | 7.44 (8.685 - 6.86)   | 8.743 (8.981 - 7.78)  | NS               |
| hsa-miR-139-5p  | 10.32 (11.87 - 9.095) | 9.468 (9.9 - 9.035)   | NS               |
| hsa-miR-148a-3p | 10.22 (11.31 - 9.65)  | 11.47 (12.31 - 10.64) | NS               |
| hsa-miR-150-5p  | 6.53 (7.115 - 5.43)   | 6.858 (7.516 - 6.195) | NS               |
| hsa-miR-15a-5p  | 12.97 (13.15 - 10.88) | 18.03 (19.29 - 17.09) | NS               |
| hsa-miR-15b-5p  | 7.015 (7.68 - 6.415)  | 8.618 (8.976 - 8.038) | NS               |
| hsa-miR-16-5p   | 8.095 (9.1 - 6.28)    | 9.543 (11.21 - 8.154) | NS               |
| hsa-miR-181b-5p | 10.69 (11.99 - 9.088) | 11.34 (14.38 - 10.5)  | NS               |
| hsa-miR-191-5p  | 8.565 (9.745 - 7.76)  | 12.4 (13.5 - 10.19)   | NS               |
| hsa-miR-195-5p  | 8.69 (9.595 - 7.265)  | 10.05 (11.85 - 9.76)  | NS               |
| hsa-miR-21-5p   | 3.55 (5.035 - 2.865)  | 5.205 (6.313 - 3.951) | NS               |
| hsa-miR-223-3p  | 3.693 (5.024 - 2.593) | 5.66 (6.293 - 3.891)  | NS               |
| hsa-miR-23a-3p  | 5.07 (5.425 - 3.905)  | 6.9 (7.08 - 5.996)    | NS               |
| hsa-miR-23b-3p  | 8.455 (10.87 - 7.85)  | 9.718 (10.33 - 9.226) | NS               |
| hsa-miR-24-3p   | 7.605 (10.26 - 6.68)  | 8.49 (10.64 - 5.545)  | NS               |
| hsa-miR-25-3p   | 6.375 (7.08 - 5.51)   | 7.88 (8.001 - 7.29)   | NS               |

|                 |                        |                       |          |
|-----------------|------------------------|-----------------------|----------|
| hsa-miR-26a-5p  | 7.08 (8.165 - 5.89)    | 9.473 (10.88 - 8.349) | NS       |
| hsa-miR-26b-5p  | 6.46 (7.565 - 5.87)    | 7.49 (7.73 - 6.675)   | NS       |
| hsa-miR-27a-3p  | 9.728 (11.01 - 8.316)  | 10.9 (12.01 - 9.78)   | NS       |
| hsa-miR-29a-3p  | 9.55 (10.57 - 8.715)   | 8.768 (11.15 - 8.21)  | NS       |
| hsa-miR-29c-3p  | 9.79 (10.56 - 9.27)    | 12.55 (13.17 - 11.93) | 0.012669 |
| hsa-miR-30a-5p  | 9.775 (10.73 - 8.415)  | 11.71 (12.65 - 11)    | 0.035762 |
| hsa-miR-30c-5p  | 10.99 (12.53 - 9.14)   | 11.59 (12.15 - 10.52) | NS       |
| hsa-miR-30d-5p  | 8.895 (10.11 - 7.675)  | 9.728 (10.85 - 7.879) | NS       |
| hsa-miR-30e-5p  | 11.5 (12.89 - 10.43)   | 12.21 (13.03 - 10.62) | NS       |
| hsa-miR-31-5p   | 11.66 (13.26 - 9.821)  | 10.47 (12.42 - 9.719) | NS       |
| hsa-miR-326     | 11.35 (13.86 - 10.08)  | 12.44 (13.3 - 12.34)  | NS       |
| hsa-miR-342-3p  | 8.875 (9.53 - 8.395)   | 9.013 (10.54 - 8.694) | NS       |
| hsa-miR-423-5p  | 5.103 (8.329 - 3.668)  | 8.2 (8.98 - 6.035)    | NS       |
| hsa-miR-574-3p  | 10.09 (10.55 - 8.605)  | 11.92 (13.8 - 10.04)  | NS       |
| hsa-miR-92a-3p  | 4.475 (5.815 - 3.93)   | 7.195 (9.028 - 5.704) | NS       |
| hsa-let-7g-5p   | 10.07 (11.55 - 8.676)  | 10.05 (13.15 - 9.875) | NS       |
| hsa-miR-106b-5p | 13.44 (18.13 - 10.64)  | 12.09 (13.22 - 10.96) | NS       |
| hsa-miR-145-5p  | 15.03 (18.37 - 12.61)  | 13.23 (15.94 - 11.49) | NS       |
| hsa-miR-146b-5p | 9.76 (14.49 - 9.073)   | 10.41 (11.33 - 8.67)  | NS       |
| hsa-miR-155-5p  | 16.65 (17.68 - 13.12)  | 14.24 (15.44 - 13.88) | NS       |
| hsa-miR-15a-3p  | 14 (17.85 - 11.98)     | 11.68 (13.68 - 9.704) | NS       |
| hsa-miR-181b-5p | 10.69 (11.99 - 9.08)   | 12.52 (17.17 - 10.81) | NS       |
| hsa-miR-19a-3p  | 11.79 (15.37 - 4.43)   | 14.17 (17.65 - 10.7)  | NS       |
| hsa-miR-19b-3p  | 11.84 (14.01 - 9.95)   | 11.22 (11.48 - 10.95) | NS       |
| hsa-miR-204-5p  | 12.8 (15.37 - 11.54)   | 11.38 (13.85 - 10.06) | NS       |
| hsa-miR-20a-5p  | 9.675 (13.39 - 5.185)  | 11.99 (12.23 - 11.75) | NS       |
| hsa-miR-20b-5p  | 8.858 (17.26 - -22.14) | 14.52 (17.38 - 14.11) | NS       |
| hsa-miR-210-3p  | 12.29 (16.34 - 11.13)  | 12.15 (13.89 - 10.85) | NS       |
| hsa-miR-27b-3p  | 11.81 (14.28 - 9.126)  | 12.03 (12.61 - 11.46) | NS       |
| hsa-miR-30b-5p  | 12.38 (14.4 - 10.94)   | 12.12 (13.62 - 10.62) | NS       |
| hsa-miR-331-3p  | 12.91 (15.24 - 12.49)  | 12.82 (15.02 - 11.04) | NS       |
| hsa-miR-335-5p  | 11.26 (13.63 - 10.06)  | 11.98 (13.74 - 10.78) | NS       |
| hsa-miR-346     | 12.18 (13.69 - 10.64)  | 11.99 (14.48 - 11.77) | NS       |
| hsa-miR-34a-5p  | 13.55 (16.03 - 11.95)  | 13.5 (16.02 - 12.12)  | NS       |
| hsa-miR-93-5p   | 12.56 (14.95 - 11.63)  | 16.05 (14.52 - 11.58) | NS       |
